# Supplementary material
Source: PubMed Central journal article supplement (PMC5986212)
Supplement: supp_RA118.002106_135562_2_supp_120633_p7wb4h.pdf [file supp_RA118.002106_135562_2_supp_120633_p7wb4h.pdf]

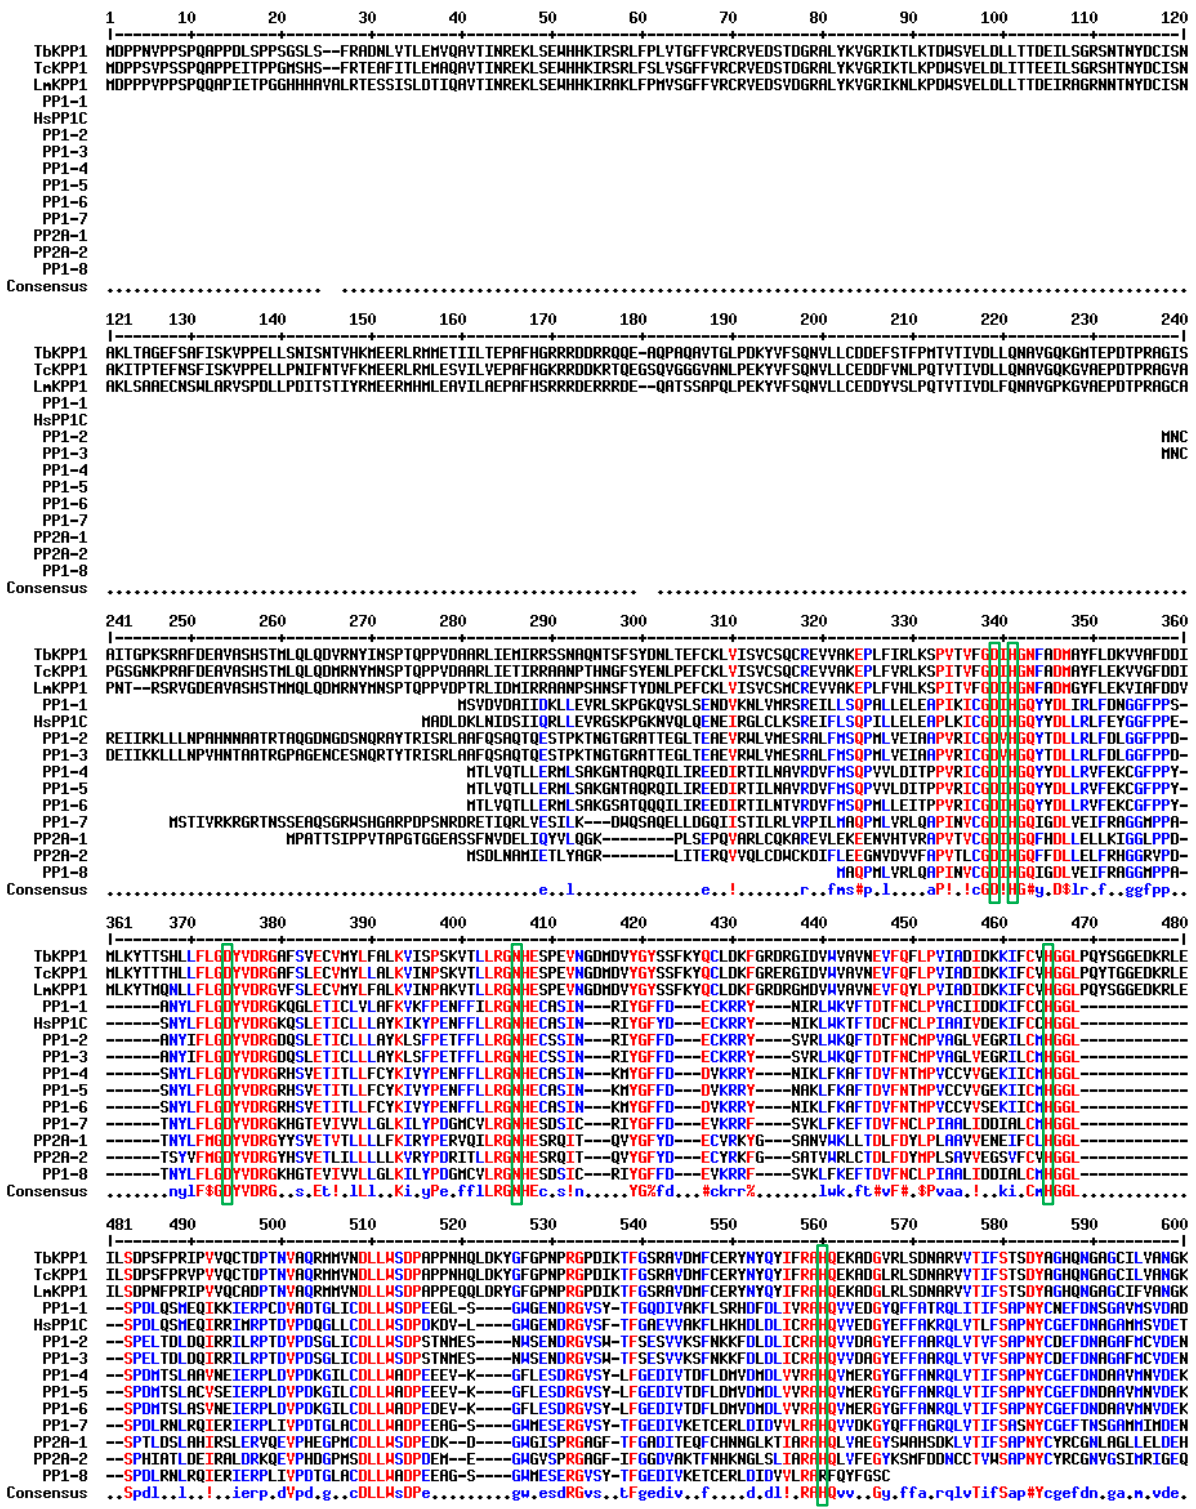

**Figure S1. Sequence alignment of the kinetoplast KPP1 homologs, human and *T. brucei* PP1 homologs, and *T. brucei* PP2A homologs.** The six manganese-coordinating residues are boxed in green boxes. The accession numbers are: TbKPP1: Tb927.5.4380; LmKPP1: LmjF.05.0100; TcKPP1: TcCLB.507601.10; PP1-1: Tb927.11.8090; PP1-2: Tb927.8.7390; PP1-3: Tb927.4.5030; PP1-4: Tb927.4.3640; PP1-5: Tb927.4.3630; PP1-6: Tb927.4.3620; PP1-7: Tb927.4.3560; PP1-8: Tb927.4.3610; PP2A-1: Tb927.3.1240; PP2A-2: Tb927.11.11940; HsPP1C: NP\_002701.1.
