# Supplementary material
Source: PubMed Central journal article supplement (PMC5986212)
Supplement: supp_RA118.002106_135562_2_supp_120635_p78b4h.pdf [file supp_RA118.002106_135562_2_supp_120635_p78b4h.pdf]

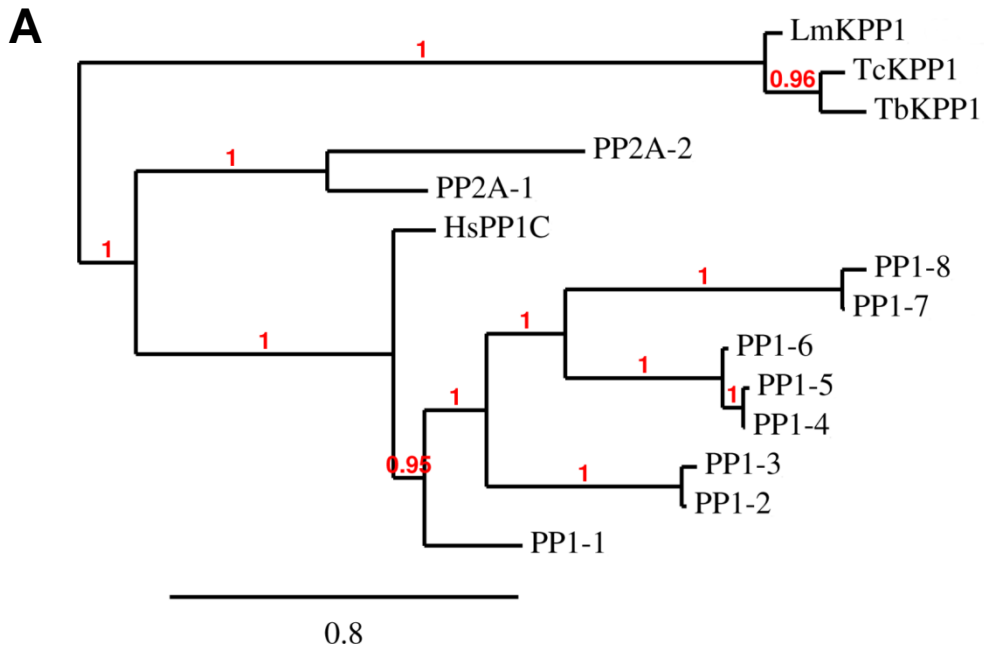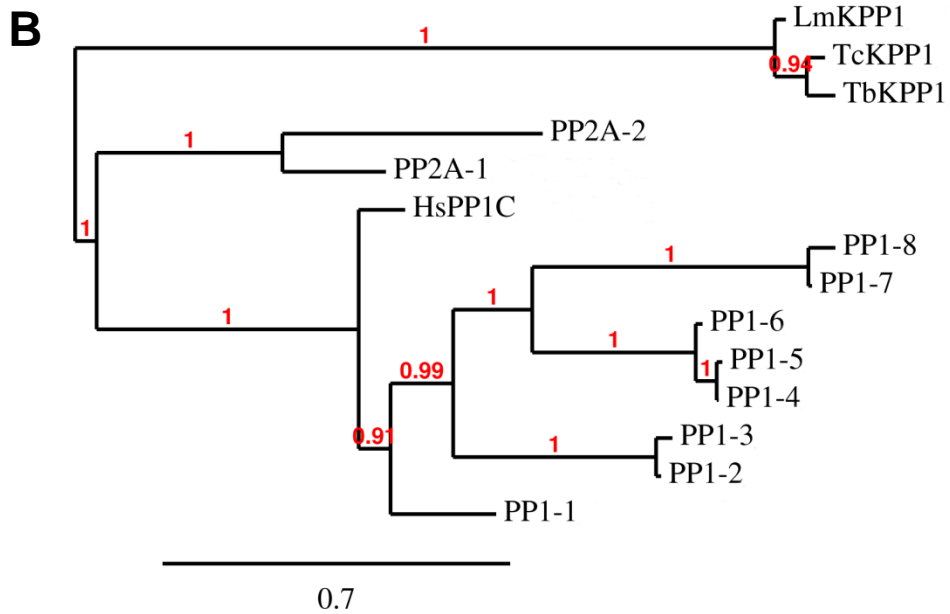

**Figure S2. Phylogenetic analysis of the kinetoplastid KPP1 homologs, human and *T. brucei* PP1 homologs, and *T. brucei* PP2A homologs. (A). Phylogenetic tree based on the full coding sequence of these protein phosphatases. (B). Phylogenetic tree based on the catalytic domain of these protein phosphatases.**
